# Supplementary material for: KRb2(NO3)2Cl: a new birefringent crystal exhibiting a perovskite-related framework and a short cutoff edge
Source: Royal Society of Chemistry journal article supplement (doi:10.1039/d3dt02952b), 2023-01-01
Supplement: d3dt02952b1.pdf [file d3dt02952b1.pdf]

## Supplementary Information

### **KRb<sub>2</sub>(NO<sub>3</sub>)<sub>2</sub>Cl: a New Birefringent Crystal Exhibiting Perovskite-Related Framework and Short Cutoff Edge**

Zhiyuan Zhang,<sup>a</sup> Die Xu,<sup>a</sup> Zhencheng Wu,<sup>a</sup> Mei Hu,<sup>b</sup> Xin Su<sup>\*a</sup> and Yineng Huang<sup>\*a</sup>

*[a] Xinjiang Laboratory of Phase Transitions and Microstructures in Condensed Matter Physics, College of Physical Science and Technology, Yili Normal University, Yining, Xinjiang, 835000, China.*

*[b] Xinjiang Key Laboratory of Solid State Physics and Devices, School of Physical Science and Technology & School of Chemical Engineering and Technology, Xinjiang University, 777 Huarui Street, Urumqi 830017, China.*

\*Corresponding author: Xin Su

E-mail: [suxin\\_phy@sina.com](mailto:suxin_phy@sina.com)

Yineng Huang

E-mail: [ynhuang@nju.edu.cn](mailto:ynhuang@nju.edu.cn)

## Reagents

Table S1. Crystal data and structure refinement for  $\text{KRb}_2(\text{NO}_3)_2\text{Cl}$ .

Table S2. Atomic coordinates ( $\times 10^4$ ) and equivalent isotropic displacement parameters ( $\text{\AA}^2 \times 10^3$ ) for  $\text{KRb}_2(\text{NO}_3)_2\text{Cl}$ .

Table S3. Bond lengths [ $\text{\AA}$ ] and angles [ $^\circ$ ] for  $\text{KRb}_2(\text{NO}_3)_2\text{Cl}$ .

Figure S1. The photograph of the  $\text{KRb}_2(\text{NO}_3)_2\text{Cl}$  crystal plate (the minimum scale is 1 mm).

Figure S2. EDS spectrum of  $\text{KRb}_2(\text{NO}_3)_2\text{Cl}$ .

Figure S3. (a) the  $\text{N}(1)\text{O}_3$  triangle; (b) the  $\text{N}(2)\text{O}_3$  triangle; (c) the  $\text{KO}_6\text{F}_2$  polyhedra; (d) the  $\text{Rb}(1)\text{O}_8\text{Cl}_2$  polyhedra ; (e) the  $\text{Rb}(2)\text{O}_8\text{Cl}_2$  polyhedra; (f) the  $\text{K}_2\text{Rb}_4\text{Cl}$  octahedra.

Figure S4. TG-DSC curves of  $\text{KRb}_2(\text{NO}_3)_2\text{Cl}$ .

Figure S5. Experimental and calculated powder XRD patterns, for  $\text{KRb}_2(\text{NO}_3)_2\text{Cl}$ .

Figure S6. The IR spectrum for  $\text{KRb}_2(\text{NO}_3)_2\text{Cl}$ .

**Figure S7. The HSE06 band structures for  $\text{KRb}_2(\text{NO}_3)_2\text{Cl}$ .**

Figure S8. Bonding electron density difference ( $\Delta\rho$ ) and contribution percent  $w$  (%) of different units in  $\text{KRb}_2(\text{NO}_3)_2\text{Cl}$  calculated by the REDA method.

**Table S1.** Crystal data and structure refinement for  $\text{KRb}_2(\text{NO}_3)_2\text{Cl}$ .

|                                                             |                                                               |
|-------------------------------------------------------------|---------------------------------------------------------------|
| Empirical formula                                           | $\text{KRb}_2(\text{NO}_3)_2\text{Cl}$                        |
| Formula weight                                              | 369.51                                                        |
| Temperature                                                 | 273.15 K                                                      |
| Wavelength                                                  | 0.71073 Å                                                     |
| Crystal system                                              | Orthorhombic                                                  |
| Space group                                                 | <i>Pbam</i>                                                   |
| Unit cell dimensions                                        | $a = 12.1863(6)$ Å<br>$b = 12.4072(7)$ Å<br>$c = 5.8203(3)$ Å |
| Volume                                                      | 880.02(8) Å <sup>3</sup>                                      |
| Z                                                           | 4                                                             |
| Density (calculated)                                        | 2.789 Mg/m <sup>3</sup>                                       |
| Absorption coefficient                                      | 11.892 mm <sup>-1</sup>                                       |
| $F(000)$                                                    | 688                                                           |
| Crystal size                                                | 0.17 × 0.16 × 0.15 mm <sup>3</sup>                            |
| Theta range for data collection                             | 2.343 to 27.492°                                              |
| Index ranges                                                | -14 ≤ h ≤ 15, -15 ≤ k ≤ 16, -7 ≤ l ≤ 7                        |
| Reflections collected                                       | 6869                                                          |
| Independent reflections                                     | 1092 [ $R_{\text{int}} = 0.0544$ ]                            |
| Completeness to theta = 27.4920°                            | 98.2 %                                                        |
| Refinement method                                           | Full-matrix least-squares on $F^2$                            |
| Data / restraints / parameters                              | 1092 / 0 / 68                                                 |
| Goodness-of-fit on $F^2$                                    | 1.111                                                         |
| Final $R$ indices [ $F_o^2 > 2\sigma(F_c^2)$ ] <sup>a</sup> | $R_1 = 0.0277$ , $wR_2 = 0.0691$                              |
| $R$ indices (all data) <sup>a</sup>                         | $R_1 = 0.0323$ , $wR_2 = 0.0719$                              |
| Largest diff. peak and hole                                 | 0.843 and -0.426 e.Å <sup>-3</sup>                            |

<sup>a</sup> $R_1 = \sum ||F_o| - |F_c|| / \sum |F_o|$  and  $wR_2 = [\sum w(F_o^2 - F_c^2)^2 / \sum w F_o^4]^{1/2}$  for  $F_o^2 > 2\sigma(F_o^2)$

**Table S2.** Atomic coordinates ( $\times 10^4$ ) and equivalent isotropic displacement parameters ( $\text{\AA}^2 \times 10^3$ ) for  $\text{KRb}_2(\text{NO}_3)_2\text{Cl}$ .

| Atom  | x       | y       | z       | U(eq)  |
|-------|---------|---------|---------|--------|
| K(1)  | 2682(1) | 1927(1) | 5000    | 27(1)  |
| Rb(1) | 1629(1) | 4778(1) | 0       | 27(1)  |
| Rb(2) | 4904(1) | 3363(1) | 0       | 30(1)  |
| N(1)  | 3784(3) | 4629(3) | 5000    | 24(1)  |
| N(2)  | 5313(4) | 1216(3) | 5000    | 29(1)  |
| O(1)  | 3591(2) | 5096(2) | 3139(5) | 38(1)  |
| O(2)  | 4160(3) | 3697(3) | 5000    | 39(1)  |
| O(3)  | 4804(2) | 1278(2) | 6870(5) | 39(1)  |
| O(4)  | 6329(3) | 1074(4) | 5000    | 48(1)  |
| Cl(1) | 2458(1) | 2329(1) | 0       | 24 (1) |

**Table S3.** Bond lengths [Å] and angles [°] for  $\text{KRb}_2(\text{NO}_3)_2\text{Cl}$ .

|                     |             |                       |             |
|---------------------|-------------|-----------------------|-------------|
| Rb(1)-Cl(1)         | 3.2020(13)  | O(4)#6-Rb(1)-O(4)#7   | 137.96(18)  |
| Rb(1)-Cl(1)#1       | 3.3551(13)  | Cl(1)#8-Rb(2)-Cl(1)   | 141.310(18) |
| Rb(1)-O(1)          | 3.035(3)    | Cl(1)#8-Rb(2)-O(1)#2  | 130.68(5)   |
| Rb(1)-O(1)#2        | 3.035(3)    | Cl(1)#8-Rb(2)-O(1)    | 130.68(5)   |
| Rb(1)-O(3)#3        | 3.159(3)    | O(1)#9-Rb(2)-Cl(1)    | 139.31(5)   |
| Rb(1)-O(3)#4        | 3.136(3)    | O(1)#2-Rb(2)-Cl(1)    | 78.98(5)    |
| Rb(1)-O(3)#5        | 3.136(3)    | O(1)#9-Rb(2)-Cl(1)#8  | 66.95(5)    |
| Rb(1)-O(3)#6        | 3.159(3)    | O(1)-Rb(2)-Cl(1)      | 78.98(6)    |
| Rb(1)-O(4)#6        | 3.1176(18)  | O(1)#10-Rb(2)-Cl(1)   | 139.31(5)   |
| Rb(1)-O(4)#7        | 3.1176(18)  | O(1)#10-Rb(2)-Cl(1)#8 | 66.95(5)    |
| Rb(2)-Cl(1)         | 3.2460(12)  | O(1)#9-Rb(2)-O(1)#2   | 101.94(7)   |
| Rb(2)-Cl(1)#8       | 3.2275(12)  | O(1)#10-Rb(2)-O(1)    | 101.94(7)   |
| Rb(2)-O(1)#9        | 3.218(3)    | O(1)#9-Rb(2)-O(1)     | 64.38(9)    |
| Rb(2)-O(1)#2        | 3.244(3)    | O(1)#10-Rb(2)-O(1)#2  | 64.38(9)    |
| Rb(2)-O(1)          | 3.244(3)    | O(1)-Rb(2)-O(1)#2     | 68.53(9)    |
| Rb(2)-O(1)#10       | 3.218(3)    | O(1)#9-Rb(2)-O(1)#10  | 69.17(10)   |
| Rb(2)-O(3)#11       | 3.166(3)    | O(3)#12-Rb(2)-Cl(1)   | 69.01(5)    |
| Rb(2)-O(3)#12       | 3.166(3)    | O(3)#11-Rb(2)-Cl(1)#8 | 79.63(5)    |
| Rb(2)-O(2)          | 3.0763(13)  | O(3)#11-Rb(2)-Cl(1)   | 69.01(5)    |
| Rb(2)-O(2)#12       | 3.0764(13)  | O(3)#12-Rb(2)-Cl(1)#8 | 79.63(5)    |
| K(1)-Cl(1)#13       | 2.9653(3)   | O(3)#11-Rb(2)-O(1)    | 101.45(7)   |
| K(1)-Cl(1)          | 2.9653(3)   | O(3)#11-Rb(2)-O(1)#2  | 147.85(7)   |
| K(1)-O(1)#14        | 2.956(3)    | O(3)#12-Rb(2)-O(1)#10 | 100.40(7)   |
| K(1)-O(1)#15        | 2.956(3)    | O(3)#12-Rb(2)-O(1)#2  | 101.45(7)   |
| K(1)-O(3)           | 2.918(3)    | O(3)#11-Rb(2)-O(1)#9  | 100.40(7)   |
| K(1)-O(3)#11        | 2.918(3)    | O(3)#11-Rb(2)-O(1)#10 | 146.51(8)   |
| K(1)-O(2)           | 2.841(4)    | O(3)#12-Rb(2)-O(1)    | 147.85(7)   |
| K(1)-O(4)#7         | 2.979(5)    | O(3)#12-Rb(2)-O(1)#9  | 146.51(8)   |
| N(1)-O(1)           | 1.251(3)    | O(3)#12-Rb(2)-O(3)#11 | 70.27(10)   |
| N(1)-O(2)           | 1.251(3)    | O(2)#12-Rb(2)-Cl(1)#8 | 108.67(7)   |
| N(1)-O(1)#11        | 1.243(5)    | O(2)#12-Rb(2)-Cl(1)   | 77.44(8)    |
| N(2)-O(4)           | 1.250(6)    | O(2)-Rb(2)-Cl(1)      | 77.44(8)    |
| N(2)-O(3)           | 1.255(3)    | O(2)-Rb(2)-Cl(1)#8    | 108.67(7)   |
| N(2)-O(3)#11        | 1.255(3)    | O(2)-Rb(2)-O(1)#9     | 63.31(9)    |
|                     |             | O(2)#12-Rb(2)-O(1)#2  | 39.87(8)    |
| Cl(1)-Rb(1)-Cl(1)#1 | 142.235(17) | O(2)#12-Rb(2)-O(1)#9  | 128.67(9)   |
| O(1)#2-Rb(1)-Cl(1)  | 82.83(6)    | O(2)-Rb(2)-O(1)#10    | 128.67(9)   |

|                      |           |                       |            |
|----------------------|-----------|-----------------------|------------|
| O(1)#2-Rb(1)-Cl(1)#1 | 67.40(5)  | O(2)#12-Rb(2)-O(1)#10 | 63.31(9)   |
| O(1)-Rb(1)-Cl(1)     | 82.83(6)  | O(2)-Rb(2)-O(1)#2     | 107.32(8)  |
| O(1)-Rb(1)-Cl(1)#1   | 67.40(5)  | O(2)-Rb(2)-O(1)       | 39.86(8)   |
| O(1)#2-Rb(1)-O(1)    | 74.02(11) | O(2)#12-Rb(2)-O(1)    | 107.32(8)  |
| O(1)#2-Rb(1)-O(3)#4  | 135.32(7) | O(2)-Rb(2)-O(3)#12    | 130.04(9)  |
| O(1)#2-Rb(1)-O(3)#6  | 105.15(8) | O(2)#12-Rb(2)-O(3)#11 | 130.04(9)  |
| O(1)-Rb(1)-O(3)#6    | 162.88(8) | O(2)#12-Rb(2)-O(3)#12 | 63.54(9)   |
| O(1)#2-Rb(1)-O(3)#5  | 90.67(8)  | O(2)-Rb(2)-O(3)#11    | 63.54(9)   |
| O(1)-Rb(1)-O(3)#5    | 135.32(7) | O(2)-Rb(2)-O(2)#12    | 142.16(14) |
| O(1)#2-Rb(1)-O(3)#3  | 162.88(8) | Cl(1)#13-K(1)-Cl(1)   | 157.87(6)  |
| O(1)-Rb(1)-O(3)#3    | 105.15(8) | Cl(1)#13-K(1)-O(4)#7  | 78.97(3)   |
| O(1)-Rb(1)-O(3)#4    | 90.67(8)  | Cl(1)-K(1)-O(4)#7     | 78.97(3)   |
| O(1)-Rb(1)-O(4)#6    | 134.30(9) | O(1)#14-K(1)-Rb(1)#14 | 48.49(6)   |
| O(1)#2-Rb(1)-O(4)#6  | 64.83(9)  | O(1)#15-K(1)-Rb(1)#14 | 82.30(6)   |
| O(1)#2-Rb(1)-O(4)#7  | 134.30(9) | O(1)#14-K(1)-Rb(1)#16 | 82.30(6)   |
| O(1)-Rb(1)-O(4)#7    | 64.83(9)  | O(1)#15-K(1)-Rb(1)#16 | 48.49(6)   |
| O(3)#4-Rb(1)-Cl(1)   | 137.64(5) | O(1)#14-K(1)-Cl(1)    | 116.13(6)  |
| O(3)#6-Rb(1)-Cl(1)#1 | 128.66(6) | O(1)#15-K(1)-Cl(1)    | 73.80(6)   |
| O(3)#3-Rb(1)-Cl(1)   | 80.12(6)  | O(1)#14-K(1)-Cl(1)#13 | 73.80(6)   |
| O(3)#5-Rb(1)-Cl(1)   | 137.64(5) | O(1)#15-K(1)-Cl(1)#13 | 116.13(6)  |
| O(3)#3-Rb(1)-Cl(1)#1 | 128.66(6) | O(1)#15-K(1)-O(1)#14  | 43.00(10)  |
| O(3)#4-Rb(1)-Cl(1)#1 | 67.96(5)  | O(1)#15-K(1)-O(4)#7   | 110.43(10) |
| O(3)#6-Rb(1)-Cl(1)   | 80.12(6)  | K(1)#8-O(4)-Rb(1)#17  | 102.56(8)  |
| O(3)#5-Rb(1)-Cl(1)#1 | 67.96(5)  | K(1)#8-O(4)-Rb(1)#8   | 102.56(8)  |
| O(3)#4-Rb(1)-O(3)#3  | 61.26(10) | N(2)#11-O(4)-Rb(1)#17 | 99.42(12)  |
| O(3)#4-Rb(1)-O(3)#5  | 71.04(11) | N(2)-O(4)-Rb(1)#17    | 99.42(12)  |
| O(4)#7-Rb(1)-O(3)#4  | 66.02(10) | N(2)-O(4)-Rb(1)#8     | 99.42(12)  |
| O(4)#7-Rb(1)-O(3)#6  | 108.38(9) | N(2)#11-O(4)-Rb(1)#8  | 99.42(12)  |
| O(4)#6-Rb(1)-O(3)#5  | 66.02(10) | N(2)#11-O(4)-K(1)#8   | 115.5(4)   |
| O(4)#6-Rb(1)-O(3)#4  | 132.71(9) | N(2)-O(4)-K(1)#8      | 115.5(4)   |

Symmetry transformations used to generate equivalent atoms:

#1  $-x+1/2, y+1/2, -z$  #2  $x, y, -z$  #3  $x-1/2, -y+1/2, -z+1$

#4  $-x+1/2, y+1/2, -z+1$  #5  $-x+1/2, y+1/2, z-1$

#6  $x-1/2, -y+1/2, z-1$  #7  $x-1/2, -y+1/2, z$

#8  $x+1/2, -y+1/2, z$  #9  $-x+1, -y+1, z$  #10  $-x+1, -y+1, -z$

#11  $x, y, -z+1$  #12  $x, y, z-1$  #13  $x, y, z+1$

#14  $-x+1/2, y-1/2, z$  #15  $-x+1/2, y-1/2, -z+1$

#16  $-x+1/2, y-1/2, -z$  #17  $x+1/2, -y+1/2, z+1$

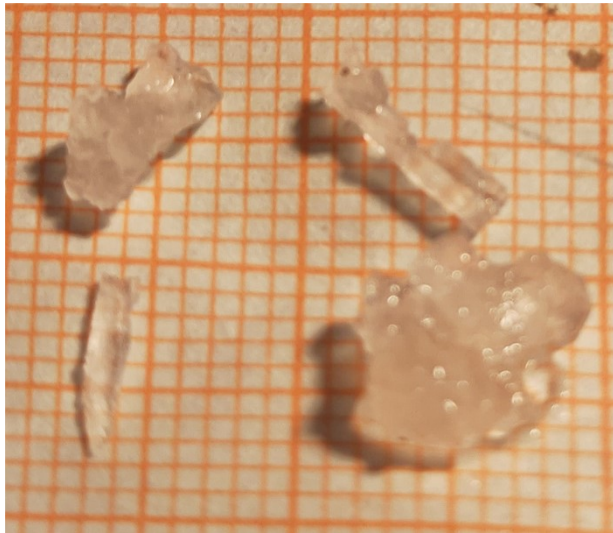

**Figure S1.** The photograph of the  $\text{KRB}_2(\text{NO}_3)_2$  crystal plate (the minimum scale is 1 mm).

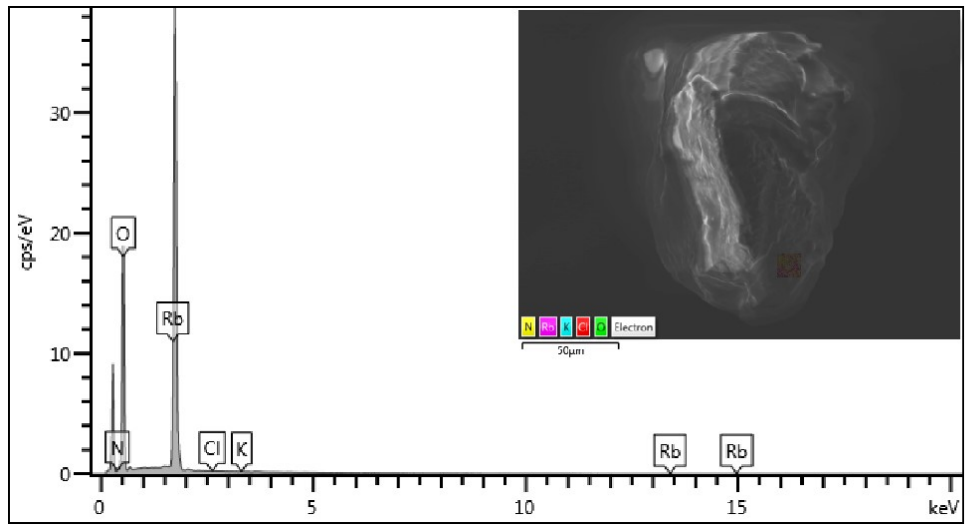

Figure S2. EDS spectrum of  $\text{KRb}_2(\text{NO}_3)_2\text{Cl}$ .





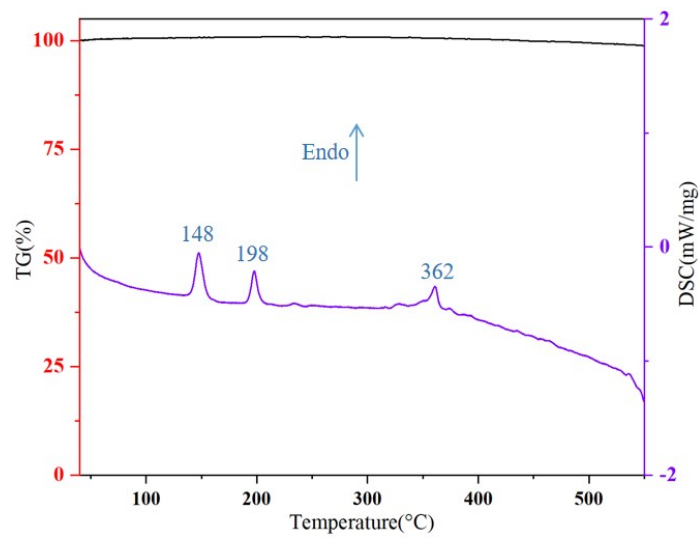

Figure S4. TG-DSC curves of KRB<sub>2</sub>(NO<sub>3</sub>)<sub>2</sub>Cl.

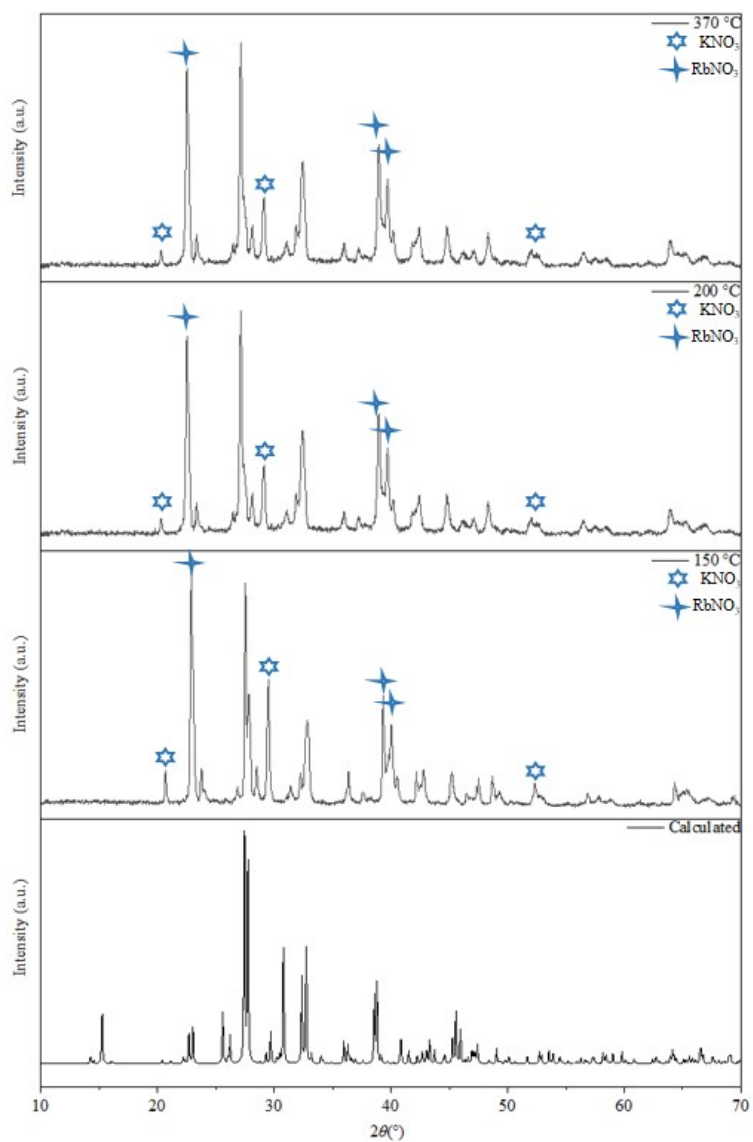

**Figure S5.** Experimental and calculated powder XRD patterns, for  $\text{KRB}_2(\text{NO}_3)_2\text{Cl}$ .

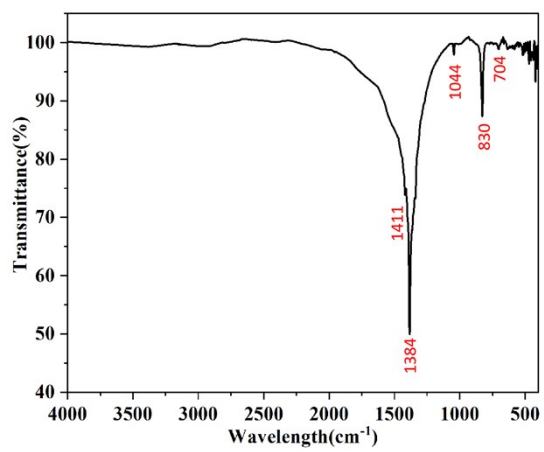

Figure S6. The IR spectrum for KRB<sub>2</sub>(NO<sub>3</sub>)<sub>2</sub>Cl.

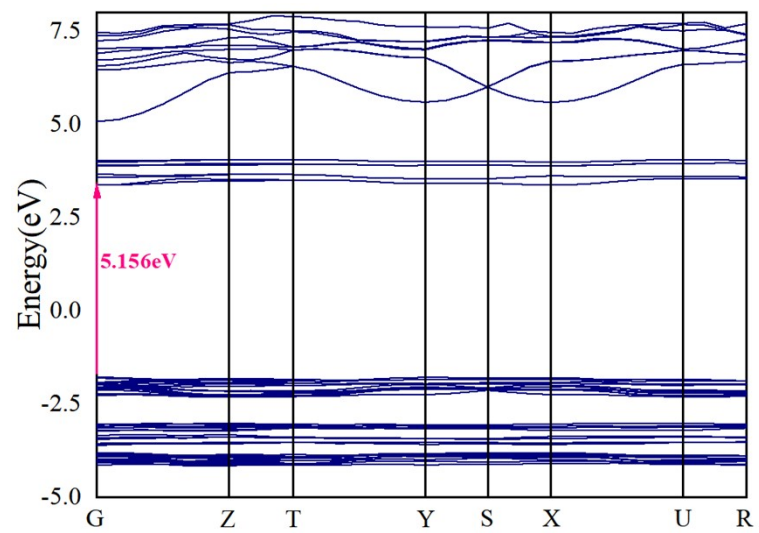

**Figure S7.** The HSE06 band structures for  $\text{KRb}_2(\text{NO}_3)_2\text{Cl}$ .

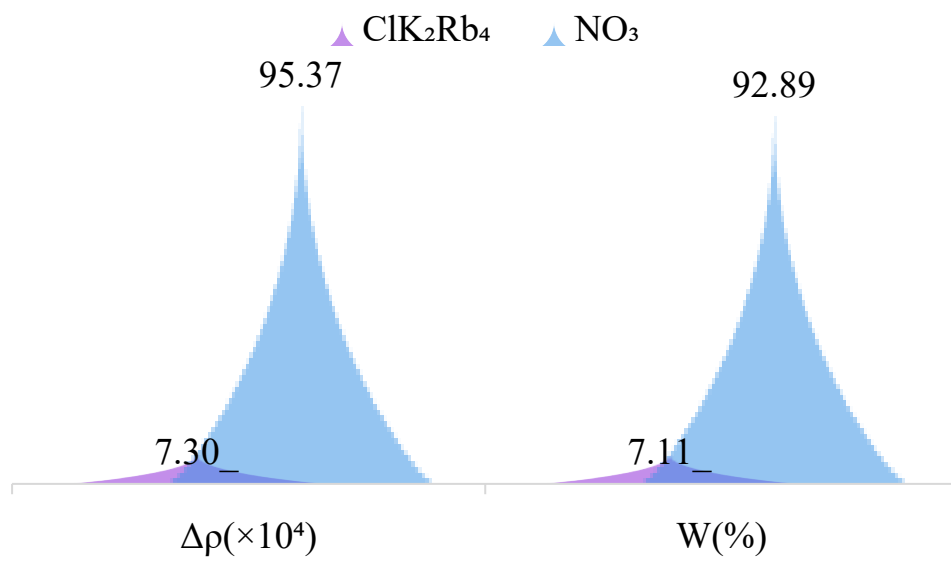

**Figure S8.** Bonding electron density difference ( $\Delta\rho$ ) and contribution percent  $w$  (%) of different units in  $\text{KRb}_2(\text{NO}_3)_2\text{Cl}$  calculated by the REDA method.
